# Supplementary material for: High-throughput screening identifies modulators of sarcospan that stabilize muscle cells and exhibit activity in the mouse model of Duchenne muscular dystrophy
Source: PubMed Central journal article supplement (PMC7499884; doi:10.1186/s13395-020-00244-3), 2020-09-18

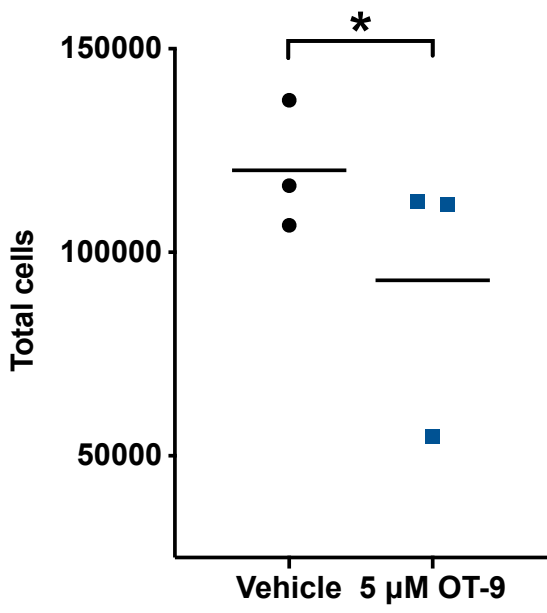

Supplement: 13395_2020_244_MOESM4_ESM.pdf [file 13395_2020_244_MOESM4_ESM.pdf]
