# Supplementary material for: High-throughput screening identifies modulators of sarcospan that stabilize muscle cells and exhibit activity in the mouse model of Duchenne muscular dystrophy
Source: PubMed Central journal article supplement (PMC7499884; doi:10.1186/s13395-020-00244-3), 2020-09-18

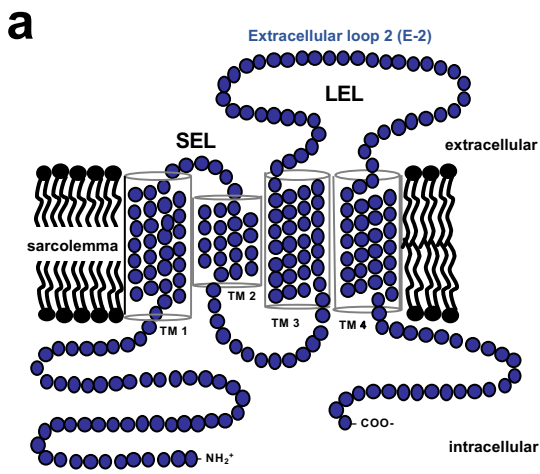

**b**

| Antibody | Company                  | Clonality  | Host   | Epitope                                     |
|----------|--------------------------|------------|--------|---------------------------------------------|
| LS-N     | LifeSpan BioSciences     | polyclonal | rabbit | Human AA 1-60 (N-terminus)                  |
| E2       | Santa Cruz Biotechnology | monoclonal | mouse  | Human AA 162-199 extracellular loop 2 (E-2) |
| NV       | Novus Biologicals        | polyclonal | mouse  | Human AA 1-243 full length                  |

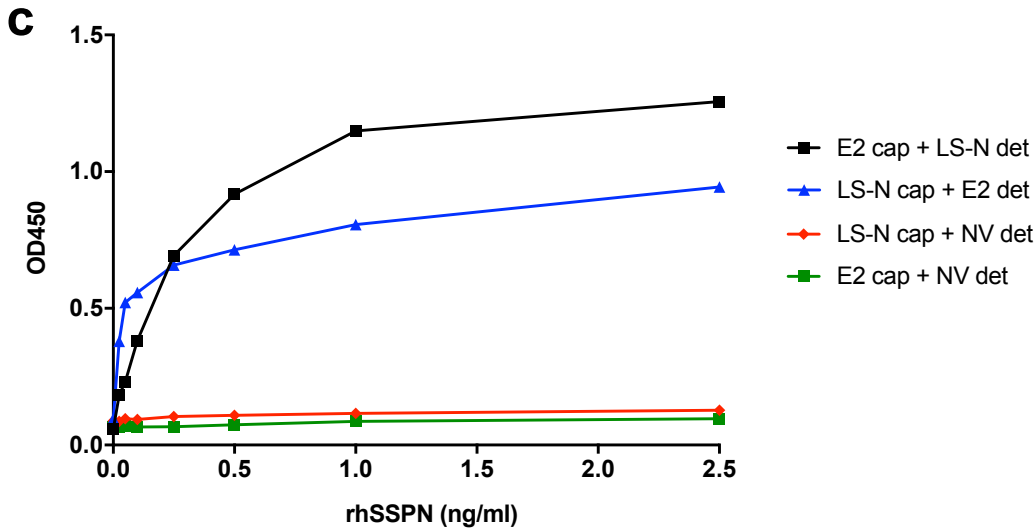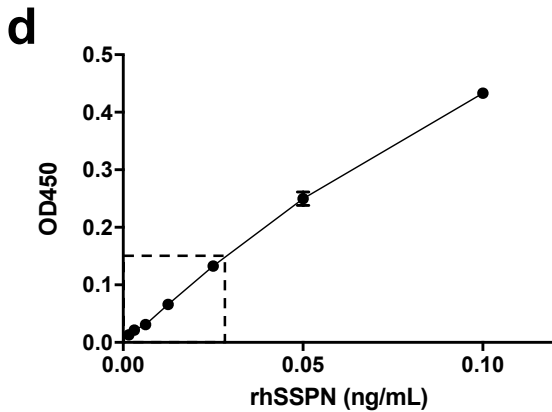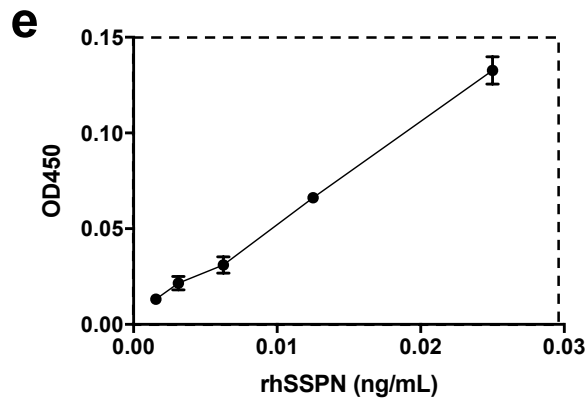

Supplement: 13395_2020_244_MOESM5_ESM.pdf [file 13395_2020_244_MOESM5_ESM.pdf]
